# Supplementary material
Source: Springer Nature journal article supplement (https://www.springermedizin.de/resource/supplementary/12904_2012_142_MOESM1_ESM.pdf/9517684)
Supplement: MOESM1 [file 9517684]

# PROCESS

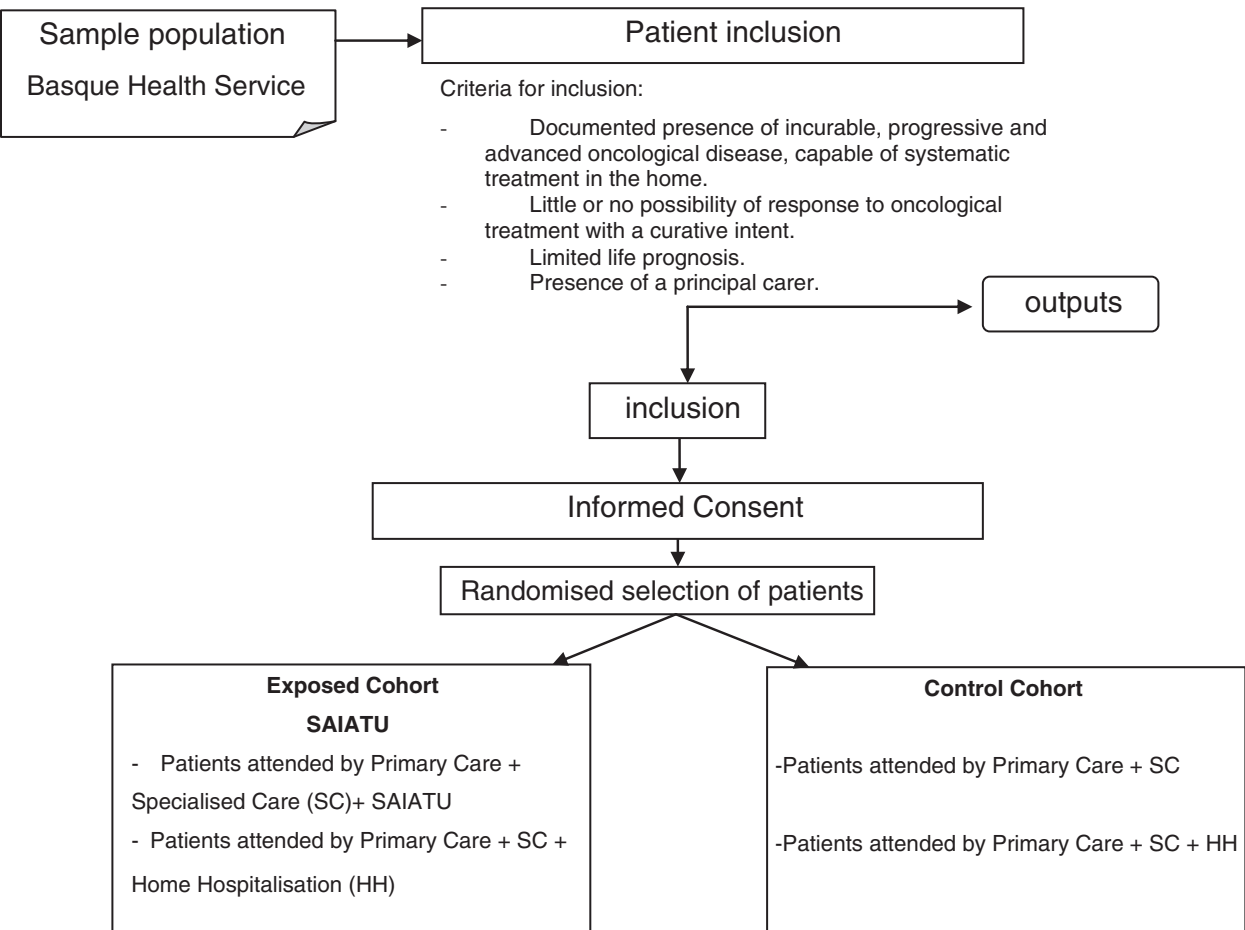

## VARIABLES TO RECORD . OSAKIDETZA INFORMATION SYSTEMS

The variables for analysis are the following:

- Number of nursing home visits.
- Number of visits to nursing home health clinics.
- Number of home visits by the family doctor.
- Number of visits to the family doctor's clinic.
- Number of specialist outpatient consultations.
- Number of visits to hospital emergency departments.
- Number of hospital admissions.
- Number of days admitted to hospital.

## VARIABLES TO RECORD. HOME HOSPITALISATION

- Number of visits by Home Hospitalisation.
- Number of calls to Home Hospitalisation.
- Grieving process (depending on the activity undertaken during the period).
- Number of bereavement support visits.
- Number of bereavement support calls.

## VARIABLES TO RECORD . SAIATU

A model will be designed to record the daily activity of SAIATU professionals, which will allow researchers to keep track of activity during the progression of the disease and throughout the grieving process.

Variables to be recorded:

During the progression of the illness:

- Number of visits by SAIATU.
- Number of calls from SAIATU.

During the grieving process:

- Number of bereavement support visits by SAIATU.
- ...- Number of bereavement support calls by SAIATU.

**COST OF CARE.** The cost of SAIATU's activities will be estimated by reference to budgetary information. Cost estimates for Hospitals, Primary Care, Home Hospitalisation and Palliative Care will be arrived at by multiplying costs by the quantity of resources consumed by each patient.

## SECONDARY VARIABLES.

Socio-demographic data.

Place of death: home or hospital.

Level of functional dependency: Karnofsky index <50.

Characterisation of the principal carer.

Quality of care in Palliative Care, measured according to the Palliative Outcome Scale and validated in Spanish
